# Supplementary material for: Empagliflozin reverses obesity and insulin resistance through fat browning and alternative macrophage activation in mice fed a high-fat diet
Source: PubMed Central journal article supplement — BMJ Open Diabetes Res Care. 2019 Oct 25;7(1):e000783. doi: 10.1136/bmjdrc-2019-000783 (PMC6827766; doi:10.1136/bmjdrc-2019-000783), 2019-10-25

**Supplementary Table 1-Antibodies used in FACS analysis.**

| Antibody                                     |             |
|----------------------------------------------|-------------|
| PerCP-Cyanine5.5-conjugated NK1.1            | eBioscience |
| PerCP-Cyanine5.5-conjugated CD3              | eBioscience |
| PerCP-Cyanine5.5-conjugated CD19             | eBioscience |
| PerCP-Cyanine5.5-conjugated TER-119          | eBioscience |
| allophycocyanin (APC)-eFluor 780-conjugated  | eBioscience |
| phycoerythrin (PE)-conjugated CD11c          | eBioscience |
| eFluor 450-conjugated Ly-6G (Gr-1)           | eBioscience |
| APC-conjugated CD8                           | eBioscience |
| eFluor 450-conjugated CD3                    | eBioscience |
| PE-conjugated NK1.1                          | eBioscience |
| fluorescein isothiocyanate (FITC)-conjugated | eBioscience |
| PE/Cy7-conjugated F4/80                      | Biolegend   |
| Alexa Fluor 647-conjugated CD206             | Biolegend   |
| APC-conjugated Ly-6C                         | Biolegend   |
| PE Texas Red-conjugated CD4                  | Abcam       |
| APC-Cy7-conjugated CD11b                     | BD          |
| PE-Texas Red-conjugated CD11b                | Invitrogen  |

**Supplementary Table 2-Primer sequences.**

| Gene           | 5' Primer               | 3' Primer               |
|----------------|-------------------------|-------------------------|
| Adiponectin    | AGCCGCTTATATGTATCGCTC   | TGCCGTCATAATGATTCTGTT   |
| Arg1           | CTCCAAGCCAAAGTCCTTAGA   | AGGAGCTGTCATTAGGGACAT   |
| Cat            | CCAGCGACCAGATGAAGCAG    | CCACTCTCTCAGGAATCCGC    |
| Ccr2           | ATTCTCCACACCCTGTTTCG    | GATTCCTGGAAGGTGGTCAA    |
| Cd11c          | AAAATCTCCAACCCATGCTG    | CACCACCAGGGTCTTCAAGT    |
| Cd206          | CAAGGAAGGTTGGCATTGT     | CCTTTCAGTCCTTTGCAAGC    |
| Cidea          | ATCACAACTGGCCTGGTTACG   | TACTACCCGGTGTCCATTCT    |
| Cpt1 $\alpha$  | AAACCCACCAGGCTACAGTG    | TCCTTGTAATGTGCGAGCTG    |
| Dio2           | CAGTGTGGTGCACGTCTCCAA   | TGAACCAAAGTTGACCACCA    |
| F4/80          | CCTTGGCTATGGGCTTCCAGT   | GCAAGGAGGACAGAGTTTAT    |
| Gp91phox       | TTG GGT CAG CAC TGG CTC | TGG CGG TGT GCA GTG CTA |
| Gpx1           | TTCGGACACCAGGAGAATGG    | TAAAGAGCGGGTGTAGCCTTC   |
| Il-1 $\beta$   | CTGAACTCAACTGTGAAATGC   | AAAGGTTTGGAAAGCAGCCCT   |
| Il-6           | GTTCTCTGGGAAATCGTGGA    | GGAAATTGGGGTAGGAAGGA    |
| Il-10          | GCTCTTACTGACTGGCATGAG   | CGCAGCTCTAGGAGCATGTG    |
| Mcp1           | AGGTCCCTGTATGCTTCTGG    | CTGCTGCTGGTGTATCCTCTTG  |
| P22phox        | GTCCACCATGGAGCGATGTG    | CAATGGCCAAGCAGACGGTC    |
| P40phox        | GCCGCTATCGCCAGTTCTAC    | GCAGGCTCAGGAGGTTCTTC    |
| P47phox        | GATGTTCCCCATTGAGGCCG    | GTTTCAGGTCATCAGGCCGC    |
| P67phox        | CTGGCTGAGGCCATCAGACT    | AGGCCACTGCAGAGTGCTTG    |
| Pgc-1 $\alpha$ | ATGTGTGCGCTTCTTGCTCT    | ATCTACTGCCTGGGGACCTT    |
| Ppara          | GAGGGTTGAGCTCAGTCA GG   | GGTCACCTACGAGTGGCATT    |
| Prdm16         | GGCGAGGAAGCTAGCCAAA     | GGTCTCCTCCTCGGCACTCT    |
| Scd1           | CATCATTCTCATGGTCCTGCT   | CCCAGTCGTACACGTCATTTT   |
| Sod            | CAGCATGGGTTCCACGTCCA    | CACATTGGCCACACCGTCCT    |
| Srebp-1c       | GGAGCCATGGATTGCACATT    | GGCCCGGGAAGTCACTGT      |
| Ucp1           | ACTGCCACACCTCCAGTCATT   | CCTTGCCTCACTCAGGATTGG   |
| $\beta$ -actin | AGG CCC AGA GCA AGA GAG | GGG GTG TTG AAG GTC TCA |

**Supplementary Table 3-Antibodies used in immunoblotting.**

| Antibody                        |                        |
|---------------------------------|------------------------|
| anti-phospho-p38 MAPK           | Cell signaling (#9211) |
| anti-p38 MAPK                   | Cell signaling (#9212) |
| anti-phospho-NF- $\kappa$ B p65 | Cell signaling (#3033) |
| anti -NF- $\kappa$ B p65        | Cell signaling (#3034) |
| anti-phospho-IR $\beta$         | Cell signaling (#3021) |
| anti-IR $\beta$                 | Cell signaling (#3025) |
| anti-phospho-Akt                | Cell signaling (#9271) |
| anti-Akt                        | Cell signaling (#9272) |
| anti-phospho-Erk 1/2            | Cell signaling (#9101) |
| anti-Erk 1/2                    | Cell signaling (#9102) |
| Anti-Fgf21                      | Abcam (ab64857)        |
| anti-Ucp1                       | Abcam (ab10983)        |
| Monoclonal anti- $\beta$ -actin | Sigma-Aldrich (A5441)  |

**Supplementary Figure S1. Empagliflozin increased urine glucose excretion in HFD-fed mice.** (A) Daily food and (B) water intake of mice in the study. (C) Urine volume and (D) urine glucose excretion rates of mice in the study. N.D., no data. Data are presented as means  $\pm$  SEM,  $n = 7-8$ . \* and \*\* indicate  $P < 0.05$  and  $0.01$ , respectively, for comparisons with NC-fed mice; # and ## indicate  $P < 0.05$  and  $0.01$ , respectively, for comparisons with HFD-fed mice.

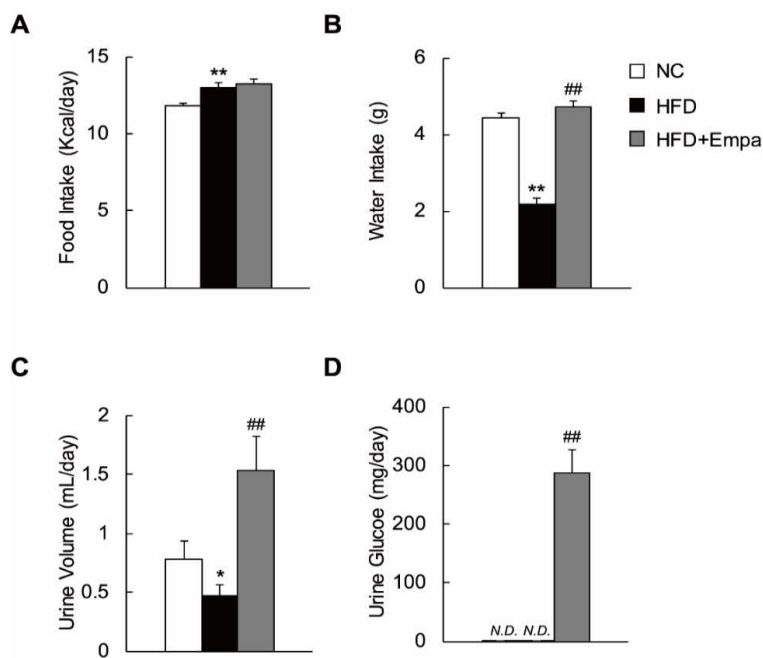

**Supplementary Figure S2. Empagliflozin increased hepatic FGF21 expression and attenuated HFD-induced oxidative stress in mice.** (A) Immunoblots of FGF21 in the liver. (B) Levels of NADPH oxidase complex mRNAs in the eWAT. (C) Levels of antioxidative stress-related gene mRNAs in the eWAT. (D) Levels of NADPH oxidase complex mRNAs in the liver. (E) Levels of antioxidative stress-related gene mRNAs in the liver. Data are presented as means  $\pm$  SEM,  $n = 7-8$ . \* and \*\* indicate  $P < 0.05$  and

0.01, respectively, for comparisons with NC-fed mice; # and ## indicate  $P < 0.05$  and 0.01, respectively, for comparisons with HFD-fed mice.

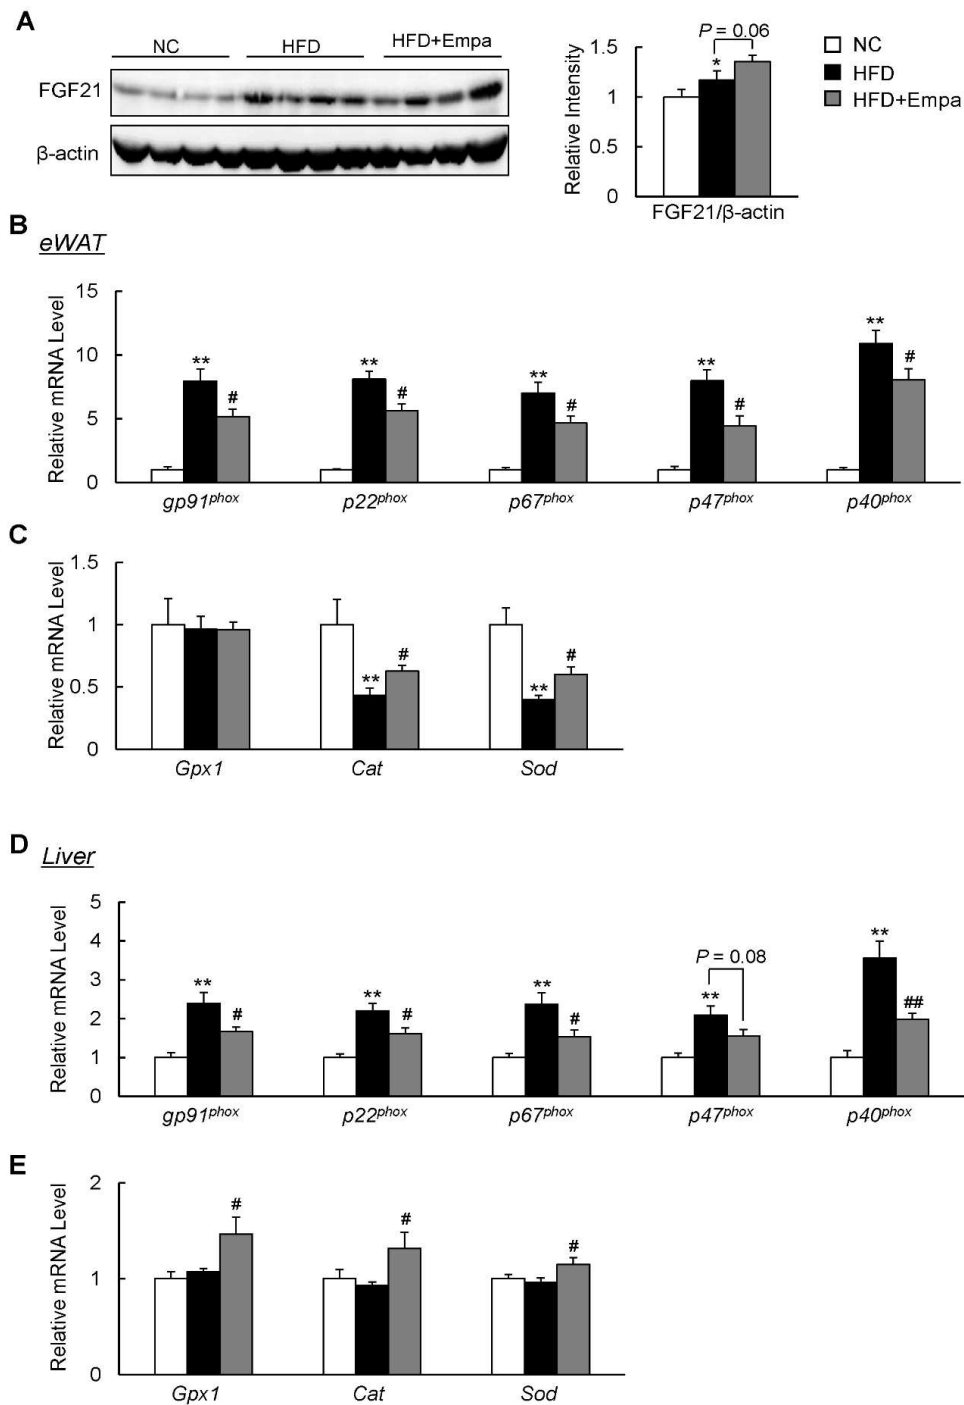

**Supplementary Figure S3. Empagliflozin decreased F4/80<sup>+</sup> cell abundance in the**

**iWAT of DIO mice.** F4/80 immunostaining in the iWAT. Scale bars = 100  $\mu$ m. \*\*

indicate  $P < 0.01$  for comparisons with NC-fed mice; # indicate  $P < 0.05$  for comparisons with HFD-fed mice.

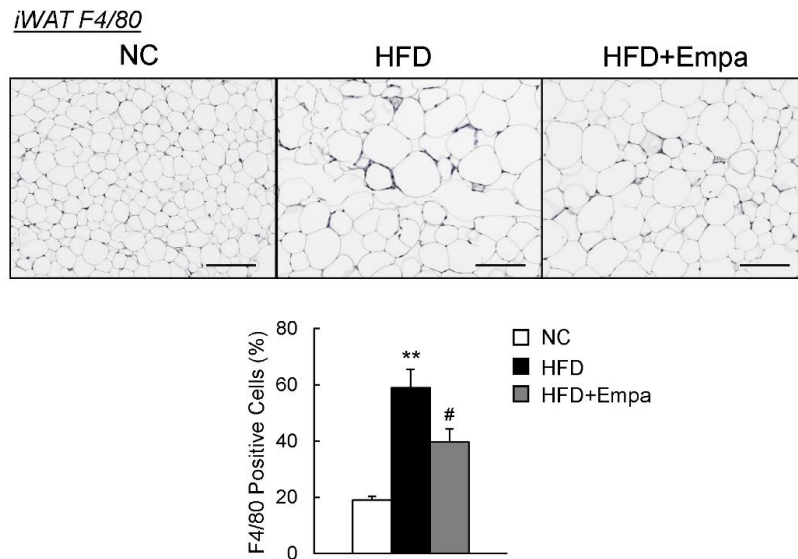

**Supplementary Figure S4. Empagliflozin decreased M1 marker expression and**

**increased M2 marker expression in the eWAT and liver.** (A) Expression of M1

marker (*Cd11c*) mRNA in the eWAT. (B) Expression of M2 marker (*Arg1*, *Cd206*, and

*IL-10*) mRNAs in the eWAT. (C) Expression *Cd11c* mRNA in the liver. (D) Expression

of *Arg1*, *Cd206*, and *IL-10* mRNAs in the liver. Data are presented as means  $\pm$  SEM,  $n =$

7–8. \* and \*\* indicate  $P < 0.05$  and 0.01, respectively, for comparisons with NC-fed

mice; # and ## indicate  $P < 0.05$  and 0.01, respectively, for comparisons with HFD-fed

mice.

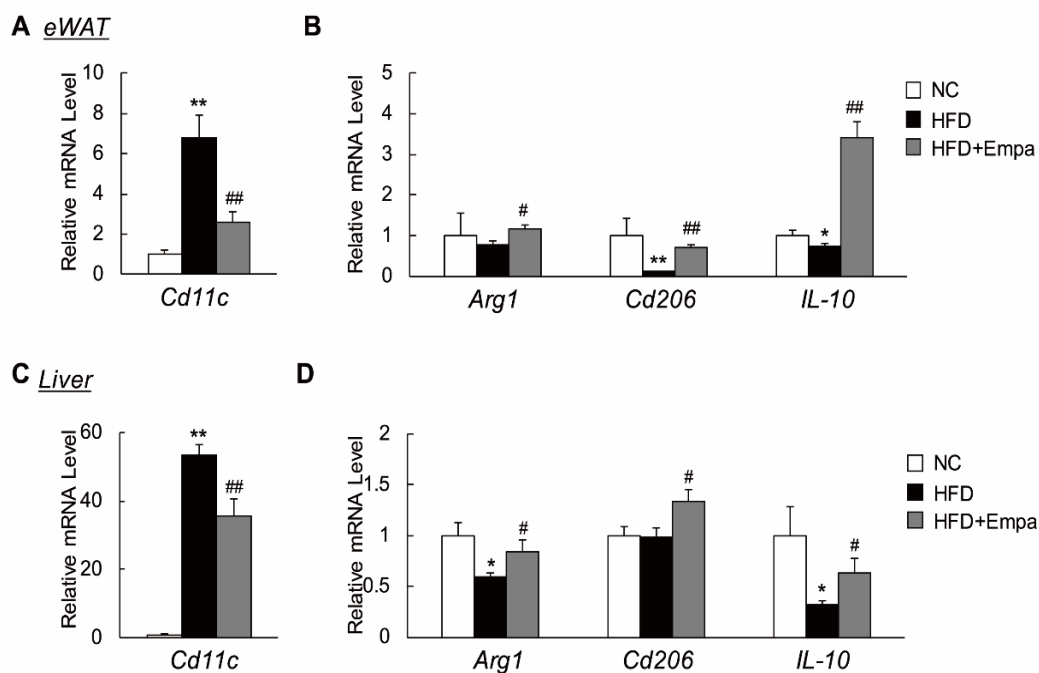

**Supplementary Figure S5. Empagliflozin decreased CD3<sup>+</sup>, CD4<sup>+</sup>, and CD8<sup>+</sup> T cell abundance in the eWAT and liver.** (A) Representative plots of CD3<sup>+</sup> T cells in the eWAT. (B) CD3<sup>+</sup>, CD8<sup>+</sup>, and CD4<sup>+</sup> T cell abundance in the eWAT. (C) Representative plots of CD3<sup>+</sup> T cells in the liver. (D) CD3<sup>+</sup>, CD8<sup>+</sup>, and CD4<sup>+</sup> T cell abundance in the liver. Data are presented as means  $\pm$  SEM,  $n=7-8$ . \* and \*\* indicate  $P < 0.05$  and  $0.01$ , respectively, for comparisons with NC-fed mice; # and ## indicate  $P < 0.05$  and  $0.01$ ,

respectively, for comparisons with HFD-fed mice.

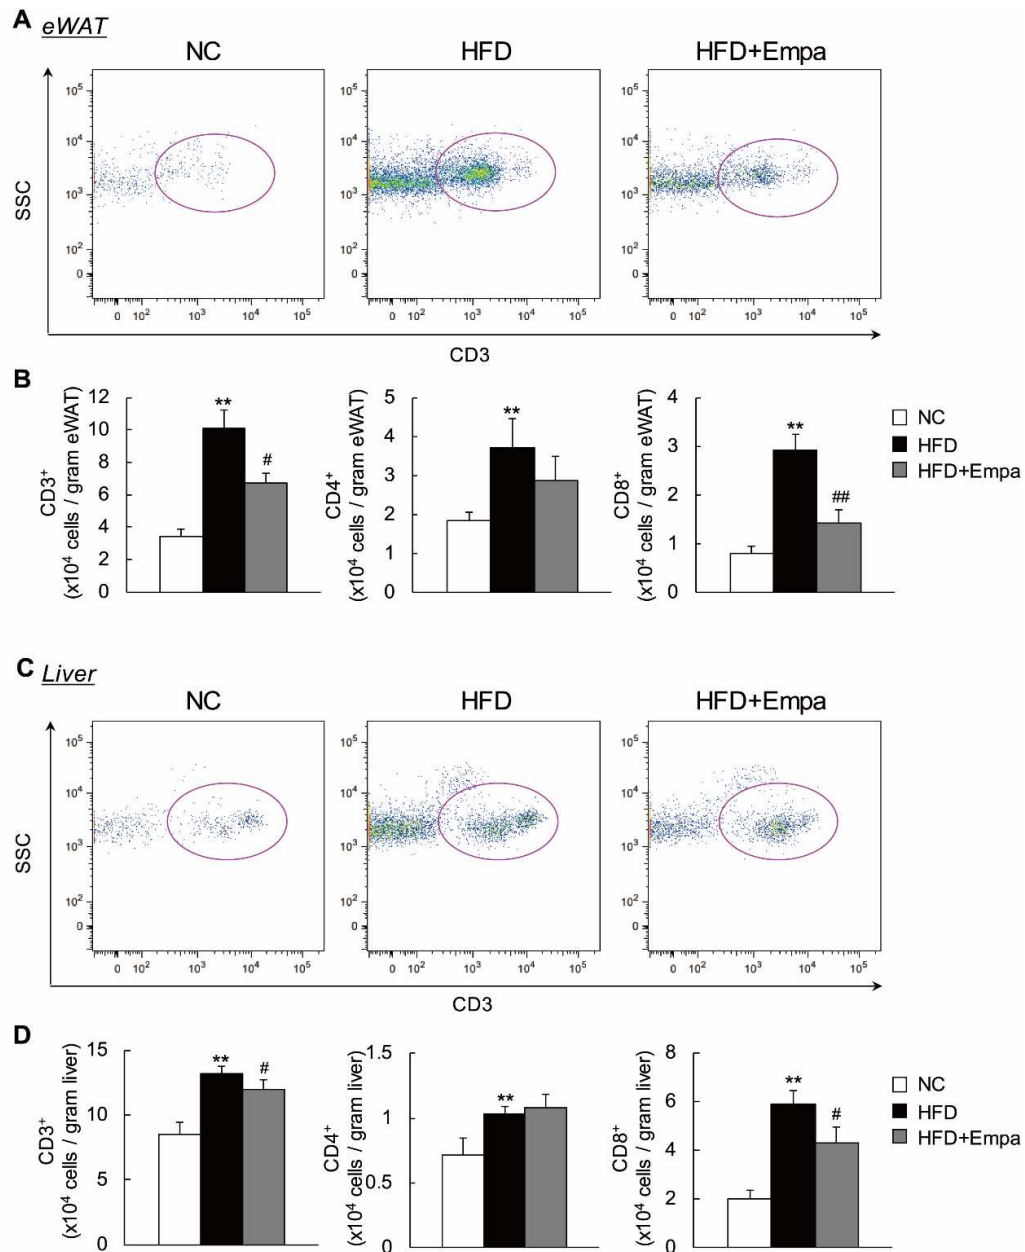

Supplement: bmjdrc-2019-000783supp001.pdf [file bmjdrc-2019-000783supp001.pdf]
